# Supplementary material for: Neuropsychological Learning Deficits as Predictors of Treatment Outcome in Patients with Eating Disorders
Source: MDPI journal article supplement (doi:10.3390/nu13072145), 2021-06-23
Supplement: s1 [file s1]

**Table S1 (supplementary)** Descriptives of the sample

|                               |                      | HC             |       | ED             |       |                  |
|-------------------------------|----------------------|----------------|-------|----------------|-------|------------------|
|                               |                      | <i>(n=191)</i> |       | <i>(n=233)</i> |       |                  |
|                               |                      | Mean           | SD    | Mean           | SD    | <i>p</i>         |
| Chronological age (years-old) |                      | 25.65          | 8.50  | 30.52          | 10.90 | <b>&lt;.001*</b> |
|                               |                      | <i>n</i>       | %     | <i>n</i>       | %     |                  |
| Sex                           | Women                | 151            | 79.1% | 190            | 81.5% | .521             |
|                               | Men                  | 40             | 20.9% | 43             | 18.5% |                  |
| Marital status                | Single               | 145            | 75.9% | 164            | 70.4% | .144             |
|                               | Married - partner    | 40             | 20.9% | 52             | 22.3% |                  |
|                               | Divorced - separated | 6              | 3.1%  | 17             | 7.3%  |                  |
| Education                     | Primary              | 11             | 5.8%  | 82             | 35.2% | <b>&lt;.001*</b> |
|                               | Secondary            | 107            | 56.0% | 95             | 40.8% |                  |
|                               | University           | 73             | 38.2% | 56             | 24.0% |                  |
| Employment                    | Unemployed           | 52             | 27.2% | 97             | 41.6% | <b>.002*</b>     |
|                               | Employed / Student   | 139            | 72.8% | 136            | 58.4% |                  |

*Note.* HC: healthy control. ED: eating disorder. SD: standard deviation.
